# Supplementary material for: Hydromorphological Assessment as a Tool for River Basin Management: Problems with the German Field Survey Method at the Transition of Two Ecoregions
Source: MDPI journal article supplement (doi:10.3390/hydrology9070120), 2022-06-30
Supplement: s1 [file s1]

# Hydromorphological Assessment as a Tool for River Basin Management: Problems with the German Field Survey Method at the Transition of Two Ecoregions

Mariam El Hourani \*, Joachim Härtling and Gabriele Broll

Institute of Geography, University of Osnabrueck, Seminarstrasse 19a/b, 49074 Osnabrueck, Germany; joachim.haertling@uni-osnabrueck.de (J.H.); gabriele.broll@uni-osnabrueck.de (G.B.)

\* Correspondence: mariam.elhourani@uni-osnabrueck.de

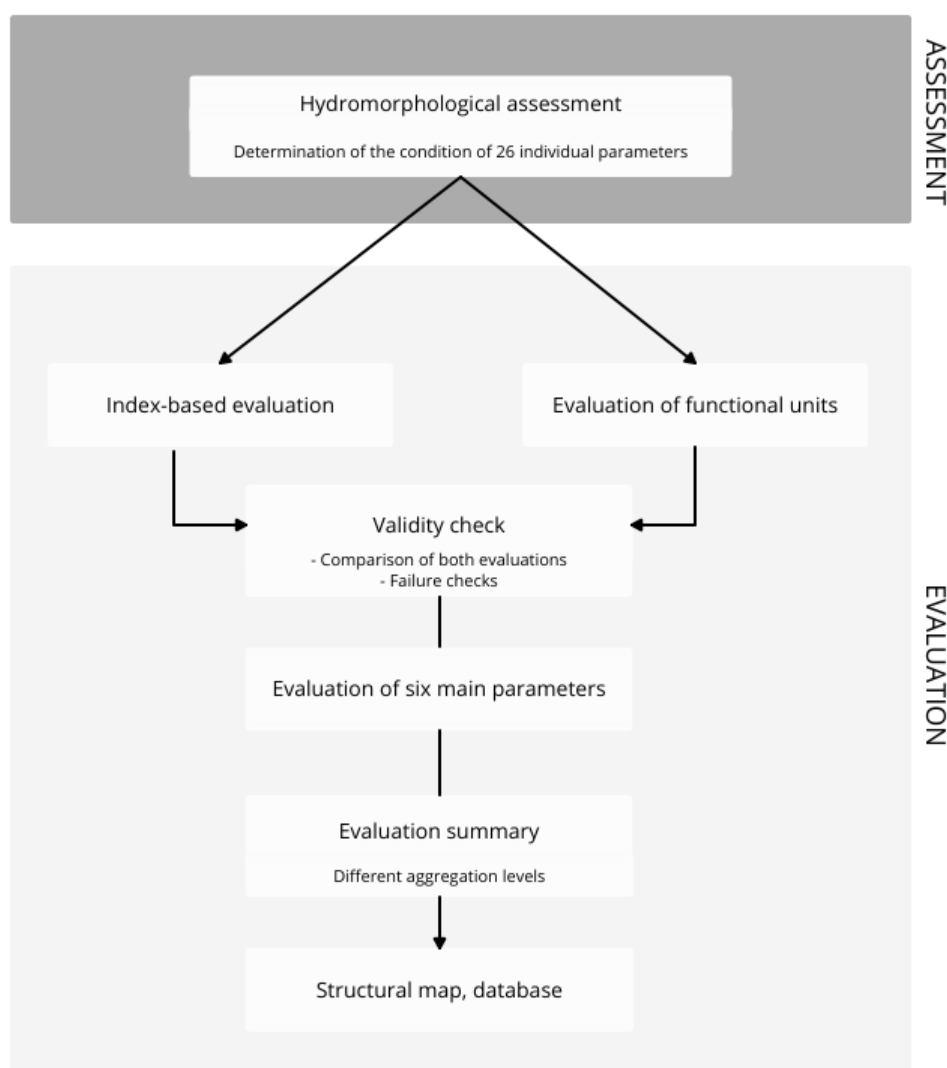

**Figure S1.** Schematic illustration of the LAWA Field Survey Method. Figure modified after [23].

**Table S1.** Explanation of the index numbers for the structural classes of the LAWA method [24].

| Class | Index Number | Change Compared to the Natural State | Short Description                                                                                                                                                                                                                                                    |
|-------|--------------|--------------------------------------|----------------------------------------------------------------------------------------------------------------------------------------------------------------------------------------------------------------------------------------------------------------------|
| 1     | 1.0–1.7      | Unchanged                            | The hydromorphological structure corresponds to the potentially natural state.                                                                                                                                                                                       |
| 2     | 1.8–2.6      | Slightly changed                     | The hydromorphological structure is only slightly influenced by individual, small-scale interventions.                                                                                                                                                               |
| 3     | 2.7–3.5      | Moderately changed                   | The hydromorphological structure is only moderately influenced by several small-scale interventions.                                                                                                                                                                 |
| 4     | 3.6–4.4      | Distinctly changed                   | The hydromorphological structure is distinctly influenced by various interventions, e.g., in the river bed, the river bank, by backwater and/or use in the floodplain area.                                                                                          |
| 5     | 4.5–5.3      | Obviously changed                    | The hydromorphological structure is impaired by a combination of interventions, e.g., in the alignment of the watercourse, by bank revetments, transverse structures, reservoir regulation, flood protection measures and/or by use in the floodplain area.          |
| 6     | 5.4–6.2      | Strongly changed                     | The hydromorphological structure is severely impaired by a combination of interventions, e.g., in the alignment of the watercourse, by bank revetments, transverse structures, reservoir regulation, flood protection measures and/or by use in the floodplain area. |
| 7     | 6.3–7        | Completely changed                   | The hydromorphological structure has been completely altered by interventions in the alignment of the watercourse, by bank revetments, transverse structures, reservoir regulation, flood protection measures and/or by use in the floodplain area.                  |
